# Supplementary material
Source: PubMed Central journal article supplement (PMC9702976)
Supplement: sj-pdf-1-ilr-10.1177_00197939221099184.pdf [file sj-pdf-1-ilr-10.1177_00197939221099184.pdf]

Online Appendices are the responsibility of the author(s);  
the material is not copyedited or formatted by the *ILR Review*.

### Supplemental Online Appendix

## Schooling and Parental Labor Supply: Evidence from COVID-19 School Closures in the United States

Catalina Amuedo-Dorantes, Miriam Marcén, Marina Morales, and Almudena Sevilla

**Table A.1**  
**Data Appendix: Summary Statistics of Controls from CPS; Table of Definitions of CPS Variables**

| Name                                 | CPS variable                                                                                                                                                                                                                                                                                                                                    | Definition                                           | Mean<br>(Men) | S.D.<br>(Men) | Mean<br>(Women) | S.D.<br>(Women) |
|--------------------------------------|-------------------------------------------------------------------------------------------------------------------------------------------------------------------------------------------------------------------------------------------------------------------------------------------------------------------------------------------------|------------------------------------------------------|---------------|---------------|-----------------|-----------------|
| <b>A. Individual characteristics</b> |                                                                                                                                                                                                                                                                                                                                                 |                                                      |               |               |                 |                 |
| Age                                  | Individual's Age                                                                                                                                                                                                                                                                                                                                | Years                                                | 41.1          | 7.20          | 39.10           | 6.53            |
| Number of children                   | NCHILD counts the number of own children (of any age or marital status) residing with each individual. NCHILD includes stepchildren and adopted children as well as biological children. Persons with no children present are coded 0.                                                                                                          | Number of own children residing with each individual | 2.44          | 1.06          | 2.37            | 1.10            |
| High school                          | EDUC indicates respondents' educational attainment, as measured by the highest year of school or degree completed. Note that completion differs from the highest year of school attendance; for example, respondents who attended 10th grade but did not finish were classified in EDUC as having completed 9th grade. Values of this variable: | Dummy variable equal to 1 if EDUC=73                 | 0.26          | 0.44          | 0.18            | 0.38            |

|                                         |                                                                                                        |     |                                                                                          |      |      |      |      |
|-----------------------------------------|--------------------------------------------------------------------------------------------------------|-----|------------------------------------------------------------------------------------------|------|------|------|------|
| College                                 | None or preschool                                                                                      | 2   | Dummy variable<br>equal to 1 if<br>EDUC=81 or<br>EDUC=91 or<br>EDUC=92                   | 0.26 | 0.44 | 0.26 | 0.44 |
|                                         | Grades 1, 2, 3, or 4                                                                                   | 10  |                                                                                          |      |      |      |      |
|                                         | Grades 5 or 6                                                                                          | 20  |                                                                                          |      |      |      |      |
|                                         | Grades 7 or 8                                                                                          | 30  |                                                                                          |      |      |      |      |
|                                         | Grade 9                                                                                                | 40  |                                                                                          |      |      |      |      |
|                                         | Grade 10                                                                                               | 50  |                                                                                          |      |      |      |      |
|                                         | Grade 11                                                                                               | 60  |                                                                                          |      |      |      |      |
|                                         | 12th grade, no diploma                                                                                 | 71  |                                                                                          |      |      |      |      |
|                                         | High school diploma or equivalent                                                                      | 73  |                                                                                          |      |      |      |      |
| More college                            | Some college but no degree                                                                             | 81  | Dummy variable<br>equal to 1 if<br>EDUC=111 or<br>EDUC=123 or<br>EDUC=124 or<br>EDUC=125 | 0.40 | 0.49 | 0.51 | 0.50 |
|                                         | Associate's degree, occupational/vocational                                                            | 91  |                                                                                          |      |      |      |      |
|                                         | Associate's degree, academic program                                                                   | 92  |                                                                                          |      |      |      |      |
|                                         | Bachelor's degree                                                                                      | 111 |                                                                                          |      |      |      |      |
|                                         | Master's degree                                                                                        | 123 |                                                                                          |      |      |      |      |
|                                         | Professional school degree                                                                             | 124 |                                                                                          |      |      |      |      |
| Doctorate degree                        | 125                                                                                                    |     |                                                                                          |      |      |      |      |
| Children under 6<br>years old in the HH | RELATE reports an individual's relationship to the head of household<br>or householder: See AGE above. |     | Dummy variable<br>equal to 1 if<br>RELATE==301<br>and age<6                              | 0.35 | 0.48 | 0.32 | 0.47 |
|                                         | Head                                                                                                   | 101 |                                                                                          |      |      |      |      |
|                                         | Spouse                                                                                                 | 201 |                                                                                          |      |      |      |      |
|                                         | Opposite sex spouse                                                                                    | 202 |                                                                                          |      |      |      |      |
|                                         | Same sex spouse                                                                                        | 203 |                                                                                          |      |      |      |      |

|                                |      |
|--------------------------------|------|
| Child                          | 301  |
| Stepchild                      | 303  |
| Parent                         | 501  |
| Sibling                        | 701  |
| Grandchild                     | 901  |
| Other relative, n.s.           | 1001 |
| Unmarried partner              | 1114 |
| Housemate/roommate             | 1115 |
| Opposite sex unmarried partner | 1116 |
| Same sex unmarried partner     | 1117 |
| Roomer/boarder/lodger          | 1241 |
| Foster children                | 1242 |
| Other nonrelatives             | 1260 |

|            |                                                                        |                                              |                                             |      |      |      |      |
|------------|------------------------------------------------------------------------|----------------------------------------------|---------------------------------------------|------|------|------|------|
| Black      | RACE indicates individual's Race                                       | Dummy variable<br>equal to 1 if<br>RACE==200 | 0.07                                        | 0.26 | 0.07 | 0.26 |      |
| Other race | White<br>Black<br>American<br>Asian<br>Other race<br>Two or more races | 100<br>200<br>300<br>650<br>700<br>800       | Dummy variable<br>equal to 1 if<br>RACE>200 | 0.09 | 0.29 | 0.10 | 0.30 |

MARST gives each person's current marital status, including whether the spouse was currently living in the same household

|                  |                                                                                                                                                                                                                                                                                                                                                                                                                                                                                |   |                                                                    |      |      |      |      |
|------------------|--------------------------------------------------------------------------------------------------------------------------------------------------------------------------------------------------------------------------------------------------------------------------------------------------------------------------------------------------------------------------------------------------------------------------------------------------------------------------------|---|--------------------------------------------------------------------|------|------|------|------|
| Unmarried        | Married, spouse present                                                                                                                                                                                                                                                                                                                                                                                                                                                        | 1 | Dummy variable equal to 1 if MARST>2                               | 0.08 | 0.28 | 0.08 | 0.27 |
|                  | Married, spouse absent                                                                                                                                                                                                                                                                                                                                                                                                                                                         | 2 |                                                                    |      |      |      |      |
|                  | Separated                                                                                                                                                                                                                                                                                                                                                                                                                                                                      | 3 |                                                                    |      |      |      |      |
|                  | Divorced                                                                                                                                                                                                                                                                                                                                                                                                                                                                       | 4 |                                                                    |      |      |      |      |
|                  | Widowed                                                                                                                                                                                                                                                                                                                                                                                                                                                                        | 5 |                                                                    |      |      |      |      |
|                  | Never married/single                                                                                                                                                                                                                                                                                                                                                                                                                                                           | 6 |                                                                    |      |      |      |      |
|                  | Widowed or Divorced                                                                                                                                                                                                                                                                                                                                                                                                                                                            | 7 |                                                                    |      |      |      |      |
|                  | NIU                                                                                                                                                                                                                                                                                                                                                                                                                                                                            | 9 |                                                                    |      |      |      |      |
| Telework         | We classify the feasibility of working at home (telework) for all occupation categories following the classification of Dingel & Neiman (2020) for each of the Standard Occupational Classification (SOC) codes, which we merge with the CPS occupational codes with the equivalence provided by the BLS in 2019 and 2020.                                                                                                                                                     |   | Dummy variable equal to 1 if the individual can telework           | 0.41 | 0.49 | 0.55 | 0.50 |
| Essential worker | We use the classification of essential workers of two states Pennsylvania and Delaware (this information is provided by the NGA) that use the official NAICS codes which can be easily matched with the CPS Codes using BLS equivalence for the years 2019 and 2020. We define essential workers as those working in an industry classified as essential by both states, and as non-essential otherwise. We admit likely measurement error because not all states use the same |   | Dummy variable equal to 1 if the individual is an essential worker | 0.51 | 0.50 | 0.51 | 0.50 |

classification of essential workers, but this is a much more precise way of determining essential industries than a possible subjective partial classification made manually from the CISA.

The official industry guidelines issued by the Department of Homeland Security through the Cybersecurity and Infrastructure Security Agency (CISA) provided an advisory guidance to identify the critical infrastructure sectors and the essential workers. However, the CISA classification (without any official codification) cannot be easily merged with the detailed Industry Classification Codes of the CPS.

See classification for telework and essential worker above. Partner refers to a spouse or unmarried partner. See also RELATE above.

|                 |                                                                                                                                                                                                                                                                                                                                                                                                                                                                                                                                               |    |                                                                                                                                                                                                         |      |      |      |      |
|-----------------|-----------------------------------------------------------------------------------------------------------------------------------------------------------------------------------------------------------------------------------------------------------------------------------------------------------------------------------------------------------------------------------------------------------------------------------------------------------------------------------------------------------------------------------------------|----|---------------------------------------------------------------------------------------------------------------------------------------------------------------------------------------------------------|------|------|------|------|
| Partner at home | EMPSTAT indicates whether persons were part of the labor force--working or seeking work--and, if so, whether they were currently unemployed. The variable also provides information on the activity ( <i>e.g.</i> , doing housework, attending school,) or status ( <i>e.g.</i> , retired, unable to work) of persons not in the labor force, as well as limited additional information on those who are in the labor force ( <i>e.g.</i> members of the Armed Forces, those with a job, but not at work last week). Values of this variable: |    | Dummy variable equal to 1 if (RELATE=201   RELATE=202   RELATE=203   RELATE=1114   RELATE=1116   RELATE=1117) & EMPSTAT>10 (not at work), or if EMPSTAT=10 & telework=1 (at work, but able to telework) | 0.60 | 0.50 | 0.53 | 0.50 |
|                 | At work                                                                                                                                                                                                                                                                                                                                                                                                                                                                                                                                       | 10 |                                                                                                                                                                                                         |      |      |      |      |
|                 | Has job, not at work last week                                                                                                                                                                                                                                                                                                                                                                                                                                                                                                                | 12 |                                                                                                                                                                                                         |      |      |      |      |
|                 | Unemployed, experienced worker                                                                                                                                                                                                                                                                                                                                                                                                                                                                                                                | 21 |                                                                                                                                                                                                         |      |      |      |      |
|                 | Unemployed, new worker                                                                                                                                                                                                                                                                                                                                                                                                                                                                                                                        | 22 |                                                                                                                                                                                                         |      |      |      |      |
|                 | NILF, unable to work                                                                                                                                                                                                                                                                                                                                                                                                                                                                                                                          | 32 |                                                                                                                                                                                                         |      |      |      |      |
|                 | NILF, other                                                                                                                                                                                                                                                                                                                                                                                                                                                                                                                                   | 34 |                                                                                                                                                                                                         |      |      |      |      |
|                 | NILF, retired                                                                                                                                                                                                                                                                                                                                                                                                                                                                                                                                 | 36 |                                                                                                                                                                                                         |      |      |      |      |

---

**B. Employment Outcomes**

---

|          |                   |                                                                     |      |      |      |      |
|----------|-------------------|---------------------------------------------------------------------|------|------|------|------|
| Employed | See EMPSTAT above | Dummy variable equal to 1 if EMPSTAT=10 (at work), or if EMPSTAT=12 | 0.97 | 0.17 | 0.96 | 0.20 |
|----------|-------------------|---------------------------------------------------------------------|------|------|------|------|

---

|                         |                                                                                                                                                                                                                                                                                                                                                                                                                                                                                          |                                                                                                                       |       |      |      |      |
|-------------------------|------------------------------------------------------------------------------------------------------------------------------------------------------------------------------------------------------------------------------------------------------------------------------------------------------------------------------------------------------------------------------------------------------------------------------------------------------------------------------------------|-----------------------------------------------------------------------------------------------------------------------|-------|------|------|------|
| Did not Work Last Week  | See EMPSTAT above                                                                                                                                                                                                                                                                                                                                                                                                                                                                        | (has job, but did not work last week)<br>Dummy variable equal to 1 if EMPSTAT=12 (has job but did not work last week) | 0.03  | 0.16 | 0.05 | 0.21 |
| Log (Weekly Work Hours) | AHRSWORKT reports the total number of hours the respondent was at work during the previous week. For employers and the self-employed, this includes all hours spent attending to their operation(s) or enterprise(s). For employees, it is the number of hours they spent at work. For unpaid family workers, it is the number of hours spent doing work directly related to the family business or farm (not including housework). The universe is Civilians age 15+ at work last week. | Logarithm of hours worked last week                                                                                   | 3.73  | 0.37 | 3.48 | 0.56 |
| NILF                    | See EMPSTAT above                                                                                                                                                                                                                                                                                                                                                                                                                                                                        | Dummy variable equal to 1 if EMPSTAT=32 or EMPSTAT=34 or EMPSTAT=36                                                   | 0.003 | 0.06 | 0.01 | 0.09 |
| Unemployed              | See EMPSTAT above                                                                                                                                                                                                                                                                                                                                                                                                                                                                        | Dummy variable equal to 1 if EMPSTAT=21 or EMPSTAT=22                                                                 | 0.03  | 0.16 | 0.03 | 0.18 |

---

**Table A.2**  
**Robustness Checks**

| <b>Panel A: Main Results Controlling for whether the Interview was done In-Person or by Telephone</b> |                    |                     |                                |                      |
|-------------------------------------------------------------------------------------------------------|--------------------|---------------------|--------------------------------|----------------------|
|                                                                                                       | (1)                | (2)                 | (3)                            | (4)                  |
|                                                                                                       | <b>Employed</b>    |                     | <b>Log (Weekly Work Hours)</b> |                      |
|                                                                                                       | <b>Men</b>         | <b>Women</b>        | <b>Men</b>                     | <b>Women</b>         |
| SC                                                                                                    | -0.033<br>(0.025)  | -0.076**<br>(0.031) | -0.117***<br>(0.026)           | -0.136**<br>(0.052)  |
| In-person                                                                                             | 0.001<br>(0.002)   | 0.003*<br>(0.002)   | 0.001<br>(0.004)               | 0.032***<br>(0.006)  |
| Mean 01/2019–02/2020                                                                                  | 0.98               | 0.97                | 3.73                           | 3.50                 |
| Observations                                                                                          | 64,716             | 57,066              | 61,081                         | 52,144               |
| R-squared                                                                                             | 0.036              | 0.040               | 0.026                          | 0.059                |
| p-value SC (1)=(2)                                                                                    |                    | 0.0179              |                                |                      |
| p-value SC (3)=(4)                                                                                    |                    |                     |                                | 0.7079               |
| <b>Panel B: Merging School Closure Data to the 7th Day of the Month</b>                               |                    |                     |                                |                      |
|                                                                                                       | <b>Employed</b>    |                     | <b>Log (Weekly Work Hours)</b> |                      |
|                                                                                                       | <b>Men</b>         | <b>Women</b>        | <b>Men</b>                     | <b>Women</b>         |
| SC                                                                                                    | -0.037*<br>(0.024) | -0.081**<br>(0.031) | -0.114***<br>(0.028)           | -0.155***<br>(0.049) |
| Mean 01/2019–02/2020                                                                                  | 0.98               | 0.97                | 3.73                           | 3.50                 |
| Observations                                                                                          | 64,716             | 57,066              | 61,081                         | 52,144               |
| R-squared                                                                                             | 0.035              | 0.040               | 0.026                          | 0.058                |
| <i>For all:</i>                                                                                       |                    |                     |                                |                      |
| State FE                                                                                              | Yes                | Yes                 | Yes                            | Yes                  |
| Year FE                                                                                               | Yes                | Yes                 | Yes                            | Yes                  |
| Month FE                                                                                              | Yes                | Yes                 | Yes                            | Yes                  |
| p-value SC (1)=(2)                                                                                    |                    | 0.0252              |                                |                      |
| p-value SC (3)=(4)                                                                                    |                    |                     |                                | 0.4213               |

*Notes:* The sample includes civilian, not institutionalized individuals from January 2019 to May 2020 Monthly CPS data living in two-parent households between 16 and 64 years old who have at least one child aged 6–12 years old. The sample in column (3) and (4) are employed individuals who are currently working, and who were at work during the prior week. We estimate Equation (4). All regressions include demographic controls for age, age squared, number of children, educational attainment, race (ref category: white), the presence of children under 6 years old in the HH, cohabitation status, and the presence of the partner at home. We also control for the type of occupation in columns (3) and (4). Please refer to Table A1 in the Appendix for a detailed description of each variable. We also include the Non-pharmaceutical Index (TNP) to control for other social measures. Estimates are weighted using CPS weights. Robust standard errors are clustered at the state level and reported in parentheses.

\*\*\* Significant at the 1% level, \*\* Significant at the 5% level, \* Significant at the 10% level.

**Table A.3**  
**Summary Statistics of Employment Variables by Gender**

| <b>Panel A: Men from Two-Parent Households</b>   |                        |             |                   |             |                   |             |                 |             |                                     |                |
|--------------------------------------------------|------------------------|-------------|-------------------|-------------|-------------------|-------------|-----------------|-------------|-------------------------------------|----------------|
|                                                  | <b>01–2019/02–2020</b> |             | <b>March 2020</b> |             | <b>April 2020</b> |             | <b>May 2020</b> |             | <b>May 2020 – pre-<br/>COVID-19</b> |                |
|                                                  | <b>Mean</b>            | <b>S.D.</b> | <b>Mean</b>       | <b>S.D.</b> | <b>Mean</b>       | <b>S.D.</b> | <b>Mean</b>     | <b>S.D.</b> | <b>Diff</b>                         | <b>p-value</b> |
| Employed                                         | 0.97                   | 0.16        | 0.96              | 0.19        | 0.89              | 0.31        | 0.91            | 0.29        | –0.05***                            | <0.01          |
| Did Not Work Last Week                           | 0.02                   | 0.15        | 0.03              | 0.18        | 0.06              | 0.25        | 0.05            | 0.21        | 0.02***                             | <0.00          |
| Log (Weekly Work Hours)                          | 3.73                   | 0.35        | 3.70              | 0.40        | 3.66              | 0.47        | 3.65            | 0.47        | –0.05***                            | <0.01          |
| <b>Panel B: Women from Two-Parent Households</b> |                        |             |                   |             |                   |             |                 |             |                                     |                |
|                                                  | <b>01–2019/02–2020</b> |             | <b>March 2020</b> |             | <b>April 2020</b> |             | <b>May 2020</b> |             | <b>May 2020 – pre-<br/>COVID-19</b> |                |
|                                                  | <b>Mean</b>            | <b>S.D.</b> | <b>Mean</b>       | <b>S.D.</b> | <b>Mean</b>       | <b>S.D.</b> | <b>Mean</b>     | <b>S.D.</b> | <b>Diff</b>                         | <b>p-value</b> |
| Employed                                         | 0.97                   | 0.18        | 0.96              | 0.20        | 0.86              | 0.34        | 0.87            | 0.34        | –0.09***                            | <0.01          |
| Did Not Work Last Week                           | 0.04                   | 0.20        | 0.05              | 0.22        | 0.09              | 0.29        | 0.07            | 0.25        | 0.02***                             | <0.01          |
| Log (Weekly Work Hours)                          | 3.50                   | 0.53        | 3.46              | 0.60        | 3.44              | 0.64        | 3.48            | 0.58        | –0.03**                             | <0.01          |

*Notes:* The sample includes individuals between 16 and 64 years old who have at least one child aged 6–12 years old. Please refer to the Data Appendix for a detailed description of each variable. The sample for employed is civilian, not institutionalized individuals from January 2019 to May 2020 Monthly CPS data. The sample for did not work last week are individuals currently employed. Finally, we use those individuals who report being at work during the prior week when analyzing Weekly Work Hours.



**Table A.4**  
**Labor Supply Response to School Closures of Two-Parent Households with Children Ages 6–12**

|                                     | (1)                       | (2)                  |
|-------------------------------------|---------------------------|----------------------|
|                                     | Log (1+Weekly Work Hours) |                      |
|                                     | Men                       | Women                |
| SC                                  | −0.293**<br>(0.134)       | −0.485***<br>(0.146) |
| TNP                                 | −0.064<br>(0.040)         | −0.019<br>(0.041)    |
| Partner at home                     | −0.082***<br>(0.014)      | −0.101***<br>(0.022) |
| Age                                 | 0.034***<br>(0.008)       | 0.043***<br>(0.010)  |
| Age <sup>2</sup> /100               | −0.042***<br>(0.010)      | −0.050***<br>(0.013) |
| Number of children                  | 0.001<br>(0.005)          | −0.062***<br>(0.008) |
| High School                         | 0.134***<br>(0.021)       | 0.101***<br>(0.034)  |
| College                             | 0.150***<br>(0.025)       | 0.036<br>(0.030)     |
| More college                        | 0.193***<br>(0.019)       | 0.119***<br>(0.031)  |
| Black                               | −0.136***<br>(0.027)      | 0.072***<br>(0.026)  |
| Other race                          | −0.104***<br>(0.017)      | −0.002<br>(0.021)    |
| Unmarried                           | −0.154***<br>(0.023)      | −0.007<br>(0.023)    |
| Children under 6 years<br>in the HH | 0.005<br>(0.010)          | −0.053***<br>(0.015) |
| State FE                            | Yes                       | Yes                  |
| Year FE                             | Yes                       | Yes                  |
| Month FE                            | Yes                       | Yes                  |
| Mean 01/2019–02/2020                | 3.58                      | 3.27                 |
| Observations                        | 64,716                    | 57,066               |
| R-squared                           | 0.056                     | 0.072                |
| p-value SC (1)=(2)                  |                           | 0.0280               |

*Notes:* The sample includes civilian, not institutionalized individuals from January 2019 to May 2020 Monthly CPS data living in two-parent households between 16 and 64 years old who have at least one child aged 6–12 years old. We estimate Equation (4). All regressions include demographic controls for age, age squared, number of children, educational attainment, race (ref category: white), the presence of children under 6 years old in the HH, cohabitation status, the presence of the partner at home, and the type of occupation. Please refer to Table A1 in the Appendix for a detailed description of each variable. We also include The Non-pharmaceutical Index (TNP) to control for other social measures. Estimates are weighted using CPS weights. Robust standard errors are clustered at the state level and reported in parentheses.

\*\*\* Significant at the 1% level, \*\* Significant at the 5% level, \* Significant at the 10% level.

**Table A.5**  
**Other Responses to School Closures of Two-Parent Households with Children Ages 6–12**

|                      | (1)              | (2)                 | (3)                    | (4)               |
|----------------------|------------------|---------------------|------------------------|-------------------|
|                      | Unemployed       |                     | Not in the Labor Force |                   |
|                      | Men              | Women               | Men                    | Women             |
| SC                   | 0.028<br>(0.025) | 0.081***<br>(0.030) | 0.005<br>(0.005)       | −0.004<br>(0.006) |
| State FE             | Yes              | Yes                 | Yes                    | Yes               |
| Year FE              | Yes              | Yes                 | Yes                    | Yes               |
| Month FE             | Yes              | Yes                 | Yes                    | Yes               |
| Mean 01/2019–02/2020 | 0.02             | 0.02                | 0.003                  | 0.01              |
| Observations         | 64,716           | 57,066              | 64,716                 | 57,066            |
| R-squared            | 0.035            | 0.040               | 0.002                  | 0.004             |
| p-value SC (1)=(2)   | 0.0023           |                     |                        |                   |
| p-value SC (3)=(4)   |                  |                     | 0.1239                 |                   |

*Notes:* The sample includes civilian, not institutionalized individuals from January 2019 to May 2020 Monthly CPS data living in two-parent households between 16 and 64 years old who have at least one child aged 6–12 years old. We estimate Equation (4). All regressions include demographic controls for age, age squared, number of children, educational attainment, race (ref category: white), the presence of children under 6 years old in the HH, cohabitation status, and the presence of the partner at home. Please refer to Table A1 in the Appendix for a detailed description of each variable. We also include the Non-pharmaceutical Index (TNP) to control for other social measures. Estimates are weighted using CPS weights. Robust standard errors are clustered at the state level and reported in parentheses.

\*\*\* Significant at the 1% level, \*\* Significant at the 5% level, \* Significant at the 10% level.

**Table A.6**  
**Excluding CA, WA, and NY**

|                      | (1)               | (2)                 | (3)                     | (4)                 |
|----------------------|-------------------|---------------------|-------------------------|---------------------|
|                      | Employed          |                     | Log (Weekly Work Hours) |                     |
|                      | Men               | Women               | Men                     | Women               |
| SC                   | -0.036<br>(0.026) | -0.081**<br>(0.034) | -0.126***<br>(0.030)    | -0.105**<br>(0.051) |
| Mean 01/2019–02/2020 | 0.98              | 0.97                | 3.73                    | 3.50                |
| Observations         | 55,728            | 49,504              | 52,724                  | 45,288              |
| R-squared            | 0.033             | 0.039               | 0.028                   | 0.063               |
| State FE             | Yes               | Yes                 | Yes                     | Yes                 |
| Year FE              | Yes               | Yes                 | Yes                     | Yes                 |
| Month FE             | Yes               | Yes                 | Yes                     | Yes                 |
| p-value SC (1)=(2)   | 0.0320            |                     |                         |                     |
| p-value SC (3)=(4)   |                   |                     | 0.6600                  |                     |

*Notes:* The sample includes civilian, not institutionalized individuals from January 2019 to May 2020 Monthly CPS data living in two-parent households between 16 and 64 years old who have at least one child aged 6–12 years old. The sample in column (3) and (4) are employed individuals who are currently working, and who were at work during the prior week. We exclude the states of California, Washington, and New York from our sample. We estimate Equation (4). All regressions include demographic controls for age, age squared, number of children, educational attainment, race (ref category: white), the presence of children under 6 years old in the HH, cohabitation status, and the presence of the partner at home. We also control for the type of occupation in columns (3) and (4). Please refer to Table A1 in the Appendix for a detailed description of each variable. We also include the Non-pharmaceutical Index (TNP) to control for other social measures. Estimates are weighted using CPS weights. Robust standard errors are clustered at the state level and reported in parentheses.

\*\*\* Significant at the 1% level, \*\* Significant at the 5% level, \* Significant at the 10% level.

**Table A.7**  
**Excluding May 2020**

|                      | (1)               | (2)               | (3)                            | (4)               |
|----------------------|-------------------|-------------------|--------------------------------|-------------------|
|                      | <b>Employed</b>   |                   | <b>Log (Weekly Work Hours)</b> |                   |
|                      | <b>Men</b>        | <b>Women</b>      | <b>Men</b>                     | <b>Women</b>      |
| SC                   | -0.004<br>(0.022) | -0.032<br>(0.039) | -0.121***<br>(0.043)           | -0.143<br>(0.090) |
| Mean 01/2019–02/2020 | 0.98              | 0.97              | 3.73                           | 3.50              |
| Observations         | 61,568            | 54,320            | 58,299                         | 49,889            |
| R-squared            | 0.032             | 0.031             | 0.025                          | 0.059             |
| State FE             | Yes               | Yes               | Yes                            | Yes               |
| Year FE              | Yes               | Yes               | Yes                            | Yes               |
| Month FE             | Yes               | Yes               | Yes                            | Yes               |
| p-value SC (1)=(2)   | 0.3219            |                   |                                |                   |
| p-value SC (3)=(4)   |                   |                   | 0.8052                         |                   |

*Notes:* The sample includes civilian, not institutionalized individuals from January 2019 to April 2020 Monthly CPS data living in two-parent households between 16 and 64 years old who have at least one child aged 6–12 years old. The sample in column (3) and (4) are employed individuals who are currently working, and who were at work during the prior week. We estimate Equation (4). All regressions include demographic controls for age, age squared, number of children, educational attainment, race (ref category: white), the presence of children under 6 years old in the HH, cohabitation status, and the presence of the partner at home. We also control for the type of occupation in columns (3) and (4). Please refer to Table A1 in the Appendix for a detailed description of each variable. We also include the Non-pharmaceutical Index (TNP) to control for other social measures. Estimates are weighted using CPS weights. Robust standard errors are clustered at the state level and reported in parentheses.

\*\*\* Significant at the 1% level, \*\* Significant at the 5% level, \* Significant at the 10% level.

**Table A.8**  
**Event Study**

|                               | <b>(1)</b>      |              | <b>(2)</b> |              | <b>(3)</b>                     |              | <b>(4)</b> |              |
|-------------------------------|-----------------|--------------|------------|--------------|--------------------------------|--------------|------------|--------------|
|                               | <b>Employed</b> |              |            |              | <b>Log (Weekly Work Hours)</b> |              |            |              |
|                               | <b>Men</b>      | <b>Women</b> | <b>Men</b> | <b>Women</b> | <b>Men</b>                     | <b>Women</b> | <b>Men</b> | <b>Women</b> |
| 15 months before the event    | -0.074          | -0.064       | -0.147     | -0.078       | (0.076)                        | (0.114)      | (0.224)    | (0.271)      |
| 14 months before the event    | -0.083          | -0.060       | -0.125     | -0.070       | (0.069)                        | (0.105)      | (0.206)    | (0.245)      |
| 13 months before the event    | -0.082          | -0.065       | -0.148     | -0.076       | (0.064)                        | (0.099)      | (0.193)    | (0.225)      |
| 12 months before the event    | -0.081          | -0.049       | -0.125     | -0.055       | (0.061)                        | (0.096)      | (0.188)    | (0.215)      |
| 11 months before the event    | -0.069          | -0.040       | -0.105     | -0.061       | (0.055)                        | (0.091)      | (0.173)    | (0.197)      |
| 10 months before the event    | -0.054          | -0.028       | -0.097     | -0.026       | (0.054)                        | (0.089)      | (0.157)    | (0.183)      |
| 9 months before the event     | -0.047          | -0.009       | -0.078     | 0.004        | (0.048)                        | (0.077)      | (0.139)    | (0.175)      |
| 8 months before the event     | -0.031          | -0.009       | -0.080     | 0.074        | (0.044)                        | (0.068)      | (0.125)    | (0.154)      |
| 7 months before the event     | -0.015          | -0.010       | -0.080     | 0.065        | (0.042)                        | (0.059)      | (0.111)    | (0.129)      |
| 6 months before the event     | -0.011          | -0.000       | -0.066     | 0.080        | (0.036)                        | (0.050)      | (0.092)    | (0.109)      |
| 5 months before the event     | -0.002          | 0.003        | -0.054     | 0.083        | (0.027)                        | (0.040)      | (0.073)    | (0.088)      |
| 4 months before the event     | 0.001           | 0.001        | -0.031     | 0.096        | (0.021)                        | (0.030)      | (0.054)    | (0.058)      |
| 3 months before the event     | -0.000          | 0.006        | -0.036     | 0.049        | (0.016)                        | (0.019)      | (0.042)    | (0.041)      |
| 2 months before the event     | 0.001           | -0.001       | 0.010      | -0.007       | (0.007)                        | (0.008)      | (0.017)    | (0.026)      |
| The month of the event x SC   | -0.034          | -0.071*      | -0.151***  | -0.209***    | (0.032)                        | (0.037)      | (0.052)    | (0.061)      |
| 1 month after the event x SC  | -0.024          | -0.060*      | -0.084**   | -0.118*      | (0.023)                        | (0.031)      | (0.035)    | (0.067)      |
| 2 months after the event x SC | 0.017           | -0.030       | -0.052     | -0.078       | (0.027)                        | (0.032)      | (0.044)    | (0.079)      |
| State FE                      | Yes             | Yes          | Yes        | Yes          |                                |              |            |              |
| Year FE                       | Yes             | Yes          | Yes        | Yes          |                                |              |            |              |
| Month FE                      | Yes             | Yes          | Yes        | Yes          |                                |              |            |              |
| Observations                  | 64,716          | 57,066       | 61,081     | 52,144       |                                |              |            |              |
| R-squared                     | 0.036           | 0.041        | 0.027      | 0.059        |                                |              |            |              |

*Notes:* The sample includes civilian, not institutionalized individuals from January 2019 to May 2020 Monthly CPS data living in two-parent households between 16 and 64 years old who have at least one child aged 6–12 years old. The sample in column (3) and (4) are employed individuals who are currently working, and who were at work during the prior week. We estimate Equation (5). All regressions include demographic controls for age, age squared, number of children, educational attainment, race (ref category: white), the presence of children under 6 years old in the HH, cohabitation status, and the presence of the partner at home. We also control for the type of occupation in columns (3) to (6). Please refer to Table A1 in the Appendix for a detailed description of each variable. We also include the Non-pharmaceutical Index (TNP) to control for other social

measures. Estimates are weighted using CPS weights. Robust standard errors are clustered at the state level and reported in parentheses.

\*\*\* Significant at the 1% level, \*\* Significant at the 5% level, \* Significant at the 10% level.

**Table A.9**  
**Identification Check:**  
**Predicting School Closures (Days between First COVID-19 Death and First SD Measure)**

| <b>Panel A: Predicting School Closures with the Share Employed</b>          |                    |                     |
|-----------------------------------------------------------------------------|--------------------|---------------------|
|                                                                             | (1)                | (2)                 |
|                                                                             | Men                | Women               |
| Share Employed                                                              | 75.938<br>(70.755) | 8.010<br>(89.765)   |
| Observations                                                                | 51                 | 51                  |
| R-squared                                                                   | 0.349              | 0.402               |
| Region FE                                                                   | Yes                | Yes                 |
| <b>Panel B: Predicting School Closures with the Log (Weekly work hours)</b> |                    |                     |
| Log (Weekly Work Hours)                                                     | 33.881<br>(26.987) | -13.353<br>(15.778) |
| Observations                                                                | 51                 | 51                  |
| R-squared                                                                   | 0.350              | 0.421               |
| Region FE                                                                   | Yes                | Yes                 |

*Notes:* We estimate  $\text{Date of first SC}_s = \alpha + Y_s^0\theta + Z_s^0\theta + \rho_r + \varepsilon_s$ , where  $\text{Date of first SC}_s$  is constructed as the date when the index first turns positive for a given state. The vector  $Y_s^0$  represents the average level of economic activity in the state prior to the school closures. Employment outcomes have been collapsed at the state level for the period January 2019 to February 2020.  $Z_s^0$  includes the average age, average gender, marriage rate, average education levels, rate of having children, rate for the presence of the partner at home, rate of black individuals, rate of individuals with other race, rate of unmarried individuals, rate of HH with children under 6 years old before the SC index turns positive in a state. The model also includes fixed effects,  $\rho_r$ , for each of the 9 U.S. regions (New England, Middle Atlantic, East North Central, West North Central, South Atlantic, East South Central, West South Central, Mountain, Pacific). Standard errors are clustered at the state level. The proportion of employed individuals by state is calculated using a sample of civilian, not institutionalized individuals living in two-parent households between 16 and 64 years old who have at least one child aged 6–12 years old. The logarithm of weekly work hours is calculated using a sample of individuals currently employed and we use those individuals who are currently working, and who were at work during the prior week. The regression includes a constant term. Estimates are weighted. Robust standard errors are clustered at the state level and reported in parentheses.

\*\*\* Significant at the 1% level, \*\* Significant at the 5% level, \* Significant at the 10% level.

**Table A.10**  
**Responses among Parents Able to Telework Based on Having an Unemployed Partner**

|                                                    | (1)                  | (2)                  | (3)                     | (4)                  |
|----------------------------------------------------|----------------------|----------------------|-------------------------|----------------------|
|                                                    | Employed             |                      | Log (Weekly Work Hours) |                      |
|                                                    | Men                  | Women                | Men                     | Women                |
| SC                                                 | -0.037*<br>(0.021)   | -0.095***<br>(0.026) | -0.121***<br>(0.026)    | -0.171***<br>(0.053) |
| Unemployed partner                                 | -0.101***<br>(0.021) | -0.140***<br>(0.027) | -0.027<br>(0.020)       | -0.039<br>(0.029)    |
| Unemployed partner x SC                            | -0.119***<br>(0.044) | -0.070<br>(0.053)    | -0.016<br>(0.037)       | 0.112*<br>(0.061)    |
| Resp able to telework                              | 0.002<br>(0.002)     | -0.000<br>(0.002)    | -0.022***<br>(0.007)    | 0.016<br>(0.012)     |
| Resp able to telework x SC                         | 0.050***<br>(0.008)  | 0.049***<br>(0.014)  | 0.021<br>(0.017)        | 0.044**<br>(0.021)   |
| Unemployed partner x<br>Resp able to telework      | 0.035<br>(0.033)     | 0.108***<br>(0.027)  | 0.034<br>(0.033)        | 0.101**<br>(0.040)   |
| Unemployed partner x<br>Resp able to telework x SC | 0.043<br>(0.043)     | -0.157**<br>(0.062)  | -0.007<br>(0.060)       | -0.144<br>(0.087)    |
| Mean 01/2019–02/2020                               | 0.98                 | 0.97                 | 3.73                    | 3.50                 |
| Observations                                       | 64,716               | 57,066               | 61,081                  | 52,144               |
| R-squared                                          | 0.040                | 0.046                | 0.057                   | 0.028                |
| State FE                                           | Yes                  | Yes                  | Yes                     | Yes                  |
| Year FE                                            | Yes                  | Yes                  | Yes                     | Yes                  |
| Month FE                                           | Yes                  | Yes                  | Yes                     | Yes                  |

*Notes:* The sample includes civilian, not institutionalized individuals from January 2019 to May 2020 Monthly CPS data living in two-parent households between 16 and 64 years old who have at least one child aged 6–12 years old. The sample in column (3) and (4) are employed individuals who are currently working, and who were at work during the prior week. We estimate Equation (4). All regressions include demographic controls for age, age squared, number of children, educational attainment, race (ref category: white), the presence of children under 6 years old in the HH, cohabitation status, and the presence of the partner at home. We also control for the type of occupation in columns (3) and (4). Please refer to Table A1 in the Appendix for a detailed description of each variable. We also include the Non-pharmaceutical Index (TNP) to control for other social measures. Estimates are weighted using CPS weights. Robust standard errors are clustered at the state level and reported in parentheses.

\*\*\* Significant at the 1% level, \*\* Significant at the 5% level, \* Significant at the 10% level.



**Table A.11**  
**Responses among Parents Able to Telework Based on Having a Partner Not in the LF**

|                                              | (1)                 | (2)                  | (3)                     | (4)                  |
|----------------------------------------------|---------------------|----------------------|-------------------------|----------------------|
|                                              | Employed            |                      | Log (Weekly Work Hours) |                      |
|                                              | Men                 | Women                | Men                     | Women                |
| SC                                           | -0.050**<br>(0.024) | -0.103***<br>(0.030) | -0.116***<br>(0.027)    | -0.165***<br>(0.053) |
| NILF partner                                 | 0.013***<br>(0.003) | -0.027**<br>(0.013)  | 0.010<br>(0.007)        | 0.106***<br>(0.026)  |
| NIL partner x SC                             | -0.024<br>(0.018)   | -0.033<br>(0.044)    | -0.038<br>(0.031)       | -0.058<br>(0.068)    |
| Resp able to telework                        | 0.003<br>(0.003)    | 0.000<br>(0.002)     | -0.026***<br>(0.007)    | 0.019<br>(0.013)     |
| Resp able to telework x SC                   | 0.061***<br>(0.011) | 0.052***<br>(0.013)  | 0.012<br>(0.015)        | 0.034<br>(0.021)     |
| NILF partner x<br>Resp able to telework      | -0.004<br>(0.005)   | 0.019<br>(0.020)     | 0.027**<br>(0.011)      | -0.009<br>(0.027)    |
| NILF partner x<br>Resp able to telework x SC | 0.005<br>(0.025)    | 0.016<br>(0.060)     | 0.060<br>(0.042)        | 0.080<br>(0.087)     |
| Mean 01/2019–02/2020                         | 0.98                | 0.97                 | 3.73                    | 3.50                 |
| Observations                                 | 64,716              | 57,066               | 61,081                  | 52,144               |
| R-squared                                    | 0.039               | 0.042                | 0.027                   | 0.059                |
| State FE                                     | Yes                 | Yes                  | Yes                     | Yes                  |
| Year FE                                      | Yes                 | Yes                  | Yes                     | Yes                  |
| Month FE                                     | Yes                 | Yes                  | Yes                     | Yes                  |

*Notes:* The sample includes civilian, not institutionalized individuals from January 2019 to May 2020 Monthly CPS data living in two-parent households between 16 and 64 years old who have at least one child aged 6–12 years old. The sample in column (3) and (4) are employed individuals who are currently working, and who were at work during the prior week. We estimate Equation (4). All regressions include demographic controls for age, age squared, number of children, educational attainment, race (ref category: white), the presence of children under 6 years old in the HH, cohabitation status, and the presence of the partner at home. We also control for the type of occupation in columns (3) and (4). Please refer to Table A1 in the Appendix for a detailed description of each variable. We also include the Non-pharmaceutical Index (TNP) to control for other social measures. Estimates are weighted using CPS weights. Robust standard errors are clustered at the state level and reported in parentheses.

\*\*\* Significant at the 1% level, \*\* Significant at the 5% level, \* Significant at the 10% level.

**Table A.12**  
**Responses among Parents Able to Telework Based on Having a Partner Able to Telework**

|                                                          | (1)                 | (2)                  | (3)                     | (4)                  |
|----------------------------------------------------------|---------------------|----------------------|-------------------------|----------------------|
|                                                          | Employed            |                      | Log (Weekly Work Hours) |                      |
|                                                          | Men                 | Women                | Men                     | Women                |
| SC                                                       | -0.062**<br>(0.025) | -0.103***<br>(0.029) | -0.127***<br>(0.028)    | -0.163***<br>(0.051) |
| Partner able to telework                                 | -0.003<br>(0.004)   | -0.000<br>(0.007)    | 0.020***<br>(0.006)     | -0.070***<br>(0.019) |
| Partner able to telework x SC                            | 0.050***<br>(0.018) | -0.003<br>(0.033)    | 0.016<br>(0.038)        | -0.049<br>(0.082)    |
| Resp able to telework                                    | 0.000<br>(0.003)    | -0.001<br>(0.004)    | -0.017<br>(0.011)       | 0.010<br>(0.017)     |
| Resp able to telework x SC                               | 0.043***<br>(0.015) | -0.007<br>(0.024)    | 0.032*<br>(0.019)       | 0.052*<br>(0.029)    |
| Partner able to telework                                 | 0.005<br>(0.005)    | 0.003<br>(0.009)     | -0.020<br>(0.013)       | 0.067***<br>(0.023)  |
| Resp able to telework                                    | -0.004<br>(0.025)   | 0.093**<br>(0.040)   | -0.026<br>(0.037)       | 0.022<br>(0.080)     |
| Partner able to telework x<br>Resp able to telework x SC |                     |                      |                         |                      |
| Mean 01/2019–02/2020                                     | 0.98                | 0.97                 | 3.73                    | 3.50                 |
| Observations                                             | 64,716              | 57,066               | 61,081                  | 52,144               |
| R-squared                                                | 0.040               | 0.044                | 0.027                   | 0.059                |
| State FE                                                 | Yes                 | Yes                  | Yes                     | Yes                  |
| Year FE                                                  | Yes                 | Yes                  | Yes                     | Yes                  |
| Month FE                                                 | Yes                 | Yes                  | Yes                     | Yes                  |

*Notes:* The sample includes civilian, not institutionalized individuals from January 2019 to May 2020 Monthly CPS data living in two-parent households between 16 and 64 years old who have at least one child aged 6–12 years old. The sample in column (3) and (4) are employed individuals who are currently working, and who were at work during the prior week. We estimate Equation (4). All regressions include demographic controls for age, age squared, number of children, educational attainment, race (ref category: white), the presence of children under 6 years old in the HH, cohabitation status, and the presence of the partner at home. We also control for the type of occupation in columns (3) and (4). Please refer to Table A1 in the Appendix for a detailed description of each variable. We also include the Non-pharmaceutical Index (TNP) to control for other social measures. Estimates are weighted using CPS weights. Robust standard errors are clustered at the state level and reported in parentheses.

\*\*\* Significant at the 1% level, \*\* Significant at the 5% level, \* Significant at the 10% level.

**Table A.13**  
**Responses among Parents Able to Telework Based on Having an Employed Partner not Working**  
**During the Last Week**

|                                                          | (1)                  | (2)                  | (3)                     | (4)                  |
|----------------------------------------------------------|----------------------|----------------------|-------------------------|----------------------|
|                                                          | Employed             |                      | Log (Weekly Work Hours) |                      |
|                                                          | Men                  | Women                | Men                     | Women                |
| SC                                                       | -0.060**<br>(0.025)  | -0.107***<br>(0.030) | -0.122***<br>(0.026)    | -0.168***<br>(0.052) |
| Partner furloughed                                       | -0.005<br>(0.008)    | -0.004<br>(0.008)    | -0.053**<br>(0.021)     | -0.074<br>(0.048)    |
| Partner furloughed x SC                                  | 0.106***<br>(0.026)  | 0.024<br>(0.044)     | -0.014<br>(0.060)       | 0.178**<br>(0.076)   |
| Resp able to telework                                    | 0.002<br>(0.002)     | 0.001<br>(0.002)     | -0.021***<br>(0.007)    | 0.019<br>(0.013)     |
| Resp able to telework x SC                               | 0.069***<br>(0.010)  | 0.054***<br>(0.014)  | 0.017<br>(0.017)        | 0.041*<br>(0.021)    |
| Partner furloughed<br>Resp able to telework              | 0.003<br>(0.010)     | 0.015<br>(0.009)     | -0.034<br>(0.037)       | -0.094<br>(0.081)    |
| Partner able to telework x<br>Resp able to telework x SC | -0.098***<br>(0.036) | -0.015<br>(0.047)    | 0.145**<br>(0.072)      | -0.007<br>(0.154)    |
| Mean 01/2019–02/2020                                     | 0.98                 | 0.97                 | 3.73                    | 3.50                 |
| Observations                                             | 64,716               | 57,066               | 61,081                  | 52,144               |
| R-squared                                                | 0.040                | 0.044                | 0.027                   | 0.059                |
| State FE                                                 | Yes                  | Yes                  | Yes                     | Yes                  |
| Year FE                                                  | Yes                  | Yes                  | Yes                     | Yes                  |
| Month FE                                                 | Yes                  | Yes                  | Yes                     | Yes                  |

*Notes:* The sample includes civilian, not institutionalized individuals from January 2019 to May 2020 Monthly CPS data living in two-parent households between 16 and 64 years old who have at least one child aged 6–12 years old. The sample in column (3) and (4) are employed individuals who are currently working, and who were at work during the prior week. We estimate Equation (4). All regressions include demographic controls for age, age squared, number of children, educational attainment, race (ref category: white), the presence of children under 6 years old in the HH, cohabitation status, and the presence of the partner at home. We also control for the type of occupation in columns (3) and (4). Please refer to Table A1 in the Appendix for a detailed description of each variable. We also include the Non-pharmaceutical Index (TNP) to control for other social measures. Estimates are weighted using CPS weights. Robust standard errors are clustered at the state level and reported in parentheses.

\*\*\* Significant at the 1% level, \*\* Significant at the 5% level, \* Significant at the 10% level.

**Table A.14**  
**Labor Supply Response to School Closures of Two-Parent Households without children**

|                      | (1)               | (2)               | (3)                     | (4)               |
|----------------------|-------------------|-------------------|-------------------------|-------------------|
|                      | Employed          |                   | Log (Weekly Work Hours) |                   |
|                      | Men               | Women             | Men                     | Women             |
| SC                   | -0.018<br>(0.035) | -0.018<br>(0.037) | -0.043<br>(0.044)       | -0.083<br>(0.060) |
| Mean 01/2019–02/2020 | 0.98              | 0.97              | 3.72                    | 3.55              |
| Observations         | 26,607            | 26,983            | 24,913                  | 24,807            |
| R-squared            | 0.028             | 0.043             | 0.032                   | 0.036             |
| State FE             | Yes               | Yes               | Yes                     | Yes               |
| Year FE              | Yes               | Yes               | Yes                     | Yes               |
| Month FE             | Yes               | Yes               | Yes                     | Yes               |
| p-value SC (1)=(2)   | 0.9876            |                   |                         |                   |
| p-value SC (3)=(4)   |                   |                   | 0.5402                  |                   |

*Notes:* The sample includes civilian, not institutionalized individuals from January 2019 to May 2020 Monthly CPS data living in two-parent households between 16 and 64 years old who have no children in the HH. The sample in column (3) and (4) are employed individuals who are currently working, and who were at work during the prior week. We exclude the states of California, Washington, and New York from our sample. We estimate Equation (4). All regressions include demographic controls for age, age squared, number of children, educational attainment, race (ref category: white), the presence of children under 6 years old in the HH, cohabitation status, and the presence of the partner at home. We also control for the type of occupation in columns (3) and (4). Please refer to Table A1 in the Appendix for a detailed description of each variable. We also include the Non-pharmaceutical Index (TNP) to control for other social measures. Estimates are weighted using CPS weights. Robust standard errors are clustered at the state level and reported in parentheses.

\*\*\* Significant at the 1% level, \*\* Significant at the 5% level, \* Significant at the 10% level.
